# Supplementary material for: Charges on nano-islands and fibrils of poly(3-hexylthiophene-2,5-diyl) – light-modulation, injection and transportation
Source: Royal Society of Chemistry journal article supplement (doi:10.1039/c5ra27711f), 2016-01-01
Supplement: c5ra27711f1.pdf [file c5ra27711f1.pdf]

## Supplementary Information

### Charges on Nano-islands and Fibrils of Poly(3-hexylthiophene-2,5-diyl) – Light- Modulation, Injection and Transportation

Haixia Xuan, Xi Chen, Yinghui Wu, Kena Song, Yuenan Li, Ruchuan Liu\*

Department of Physics, Chongqing University, Chongqing 401331, P. R. China.

Quantification of photo-induced charges for nano-islands and fibrils based on P3HT  
revealed by SKPM and EFM

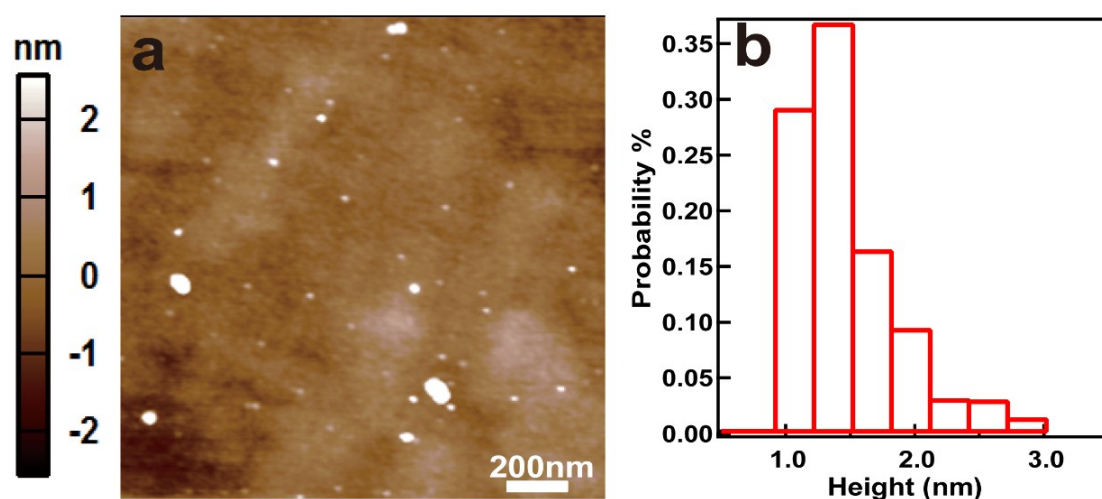

**Figure S1.**Topography and the distribution of CdS nanoparticles. The heights are almost below 3 nm, and only a very few are several hundred nanometers. Therefore they maybe hide under the islands.

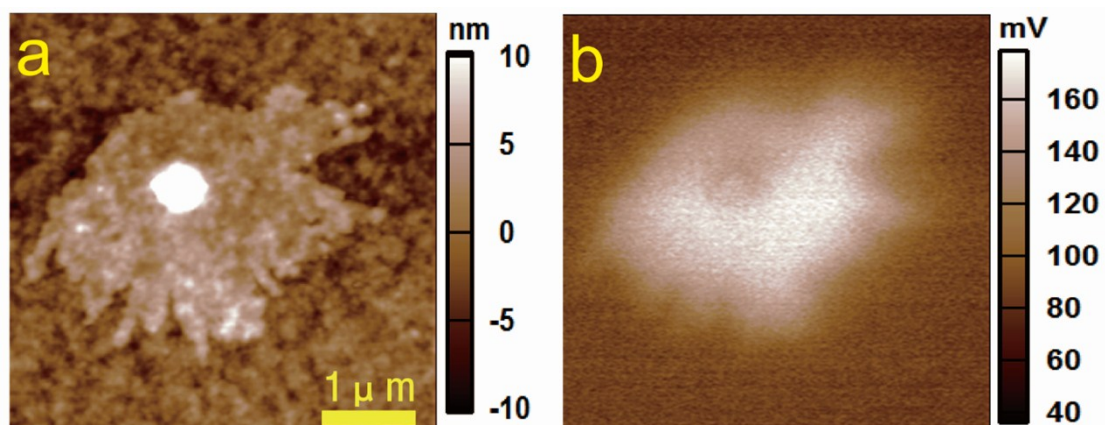

**Figure S2.** Topography and SKPM image of P3HT nano-islands coupled with CdS/CdSe nanoparticles. The surface potential of nanoparticle is lower than the island.

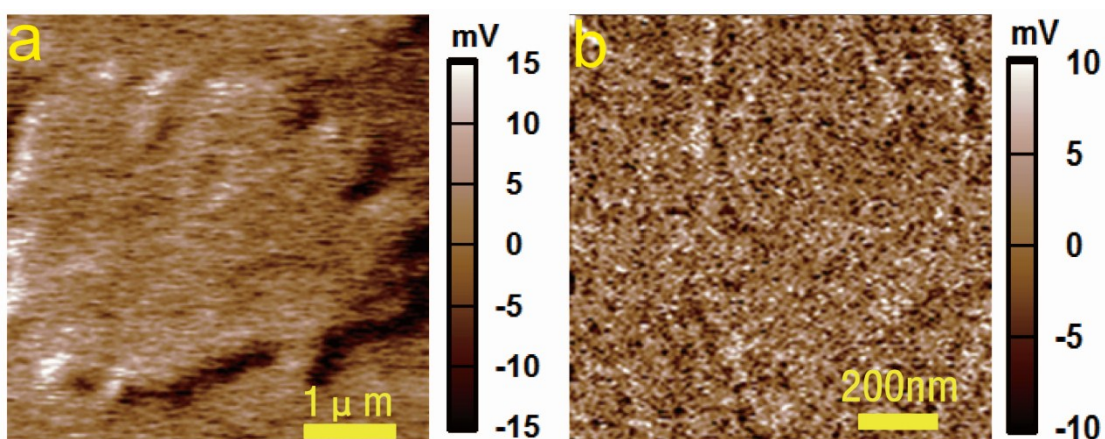

**Figure S3.** Differential SKPM images between light on and off for (a) nano-islands; (b) nano-fibrils.

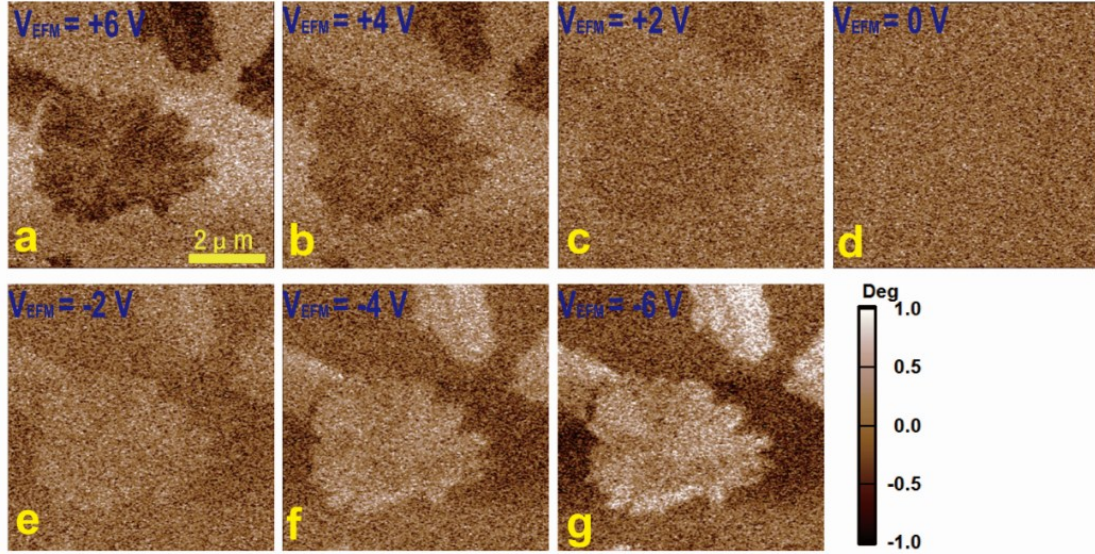

**Figure S4.** The detailed changes of phase shift of the P3HT islands with different bias to the tip of (a) +6 V,  $V_{EFM} = +6$  V; (b) +4 V,  $V_{EFM} = +4$  V; (c) +2 V,  $V_{EFM} = +2$  V; (d) 0 V,  $V_{EFM} = 0$  V; (e) -2 V,  $V_{EFM} = -2$  V; (f) -4 V,  $V_{EFM} = -4$  V; (g) -6 V,  $V_{EFM} = -6$  V. The color bar of EFM images displayed the relative phase shift with respect to the ITO substrate.

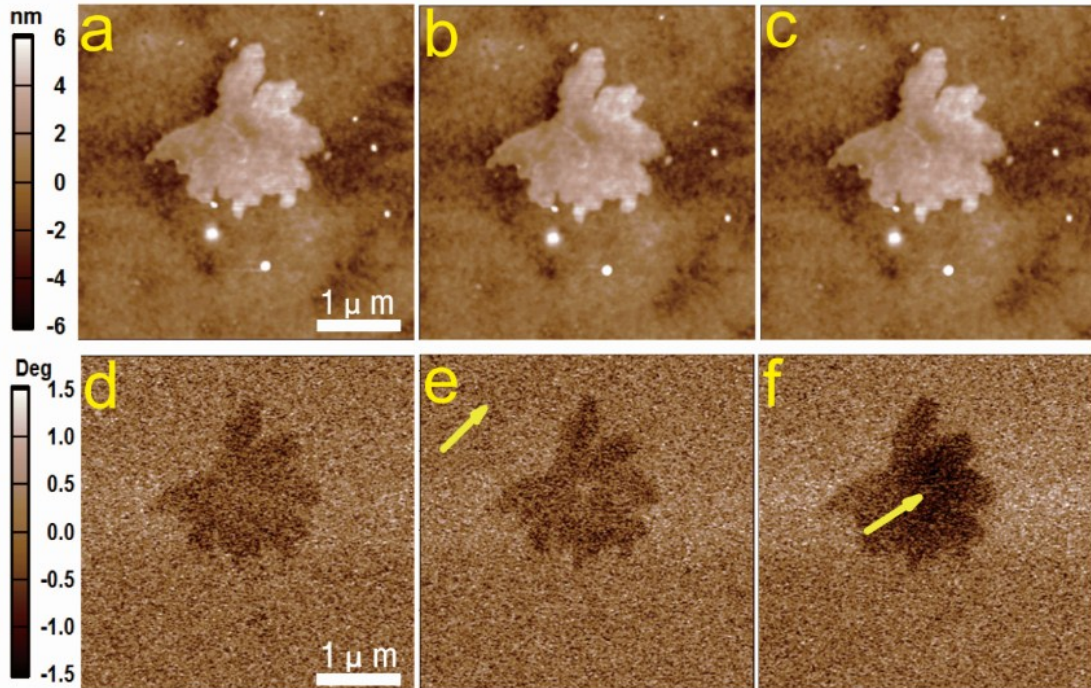

**Figure S5.** The comparison on ability to accept charges for P3HT islands and substrate.

(a) Topographic image and (d) EFM image (phase shift,  $V_{EFM} = 3$  V,  $z = 50$  nm) before

charge injection. (b) Topographic image and (e) EFM image after charge injection (at the point marked by the arrow) at  $V_{INJ} = +5$  V for 200 s. There is no change in the two images. (c) Topographic image and (f) EFM image after charge injection (at the point marked by the arrow) at  $V_{INJ} = +5$  V for 200 s. The EFM image changed compare to the image before charge injection.

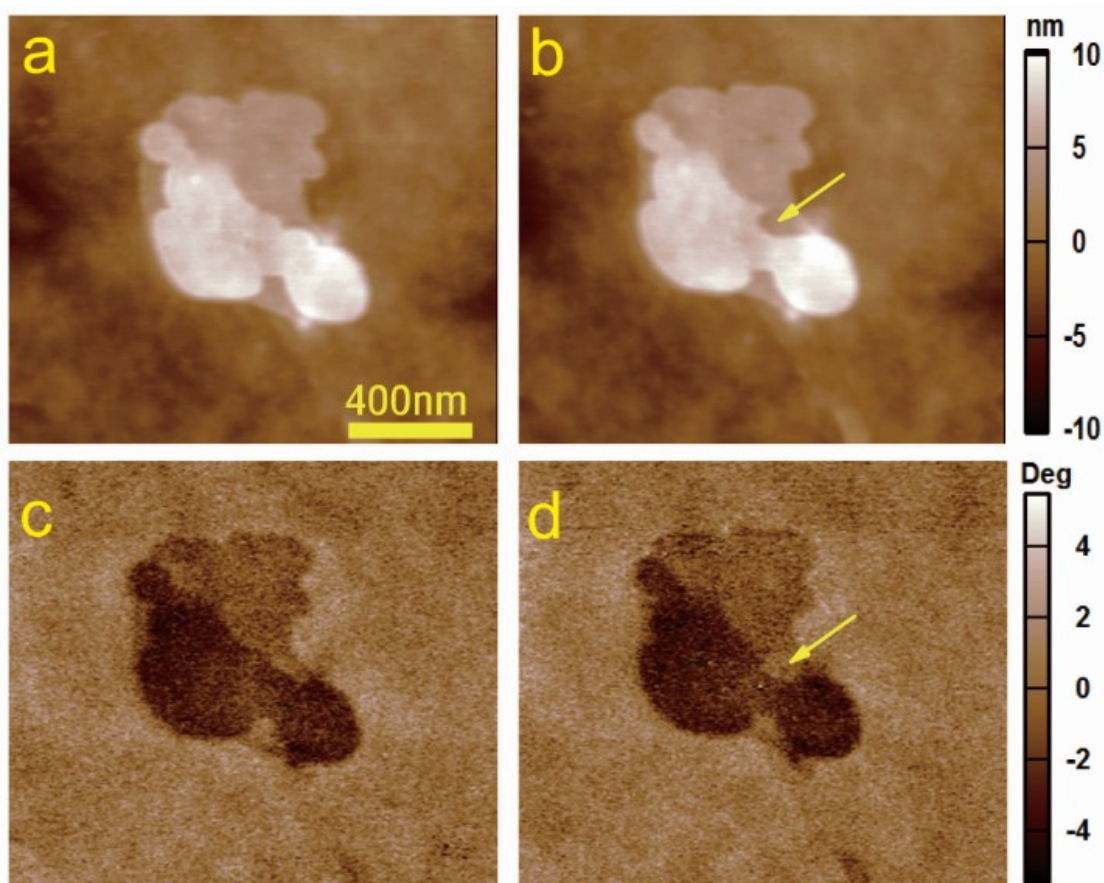

**Figure S6.** The changes on topographic and EFM images of P3HT islands on Si/SiO<sub>2</sub> by applying a negative voltage. (a) Topographic image and (c) EFM image (phase shift,  $V_{EFM} = 3$  V,  $z = 50$  nm) before charge injection; (b) Topographic image and (d) EFM image changed after charge injection (at the point marked by the arrow) at  $V_{INJ} = -1$  V for 20 s.

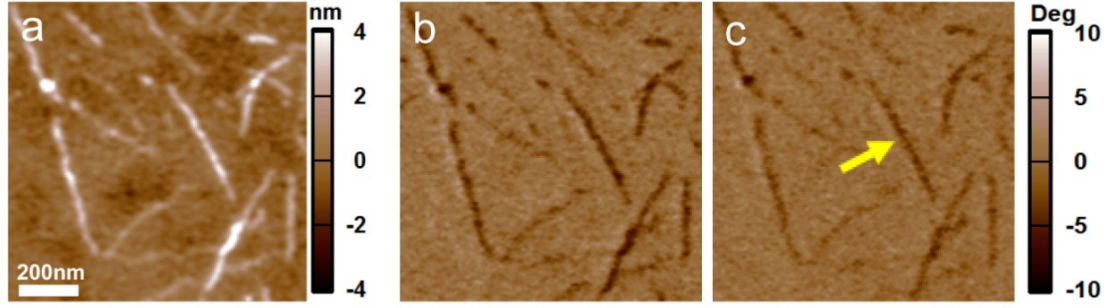

**Figure S7.** The topography and EFM images of P3HT fibrils on Si/SiO<sub>2</sub> by applying a positive voltage. (a) Topographic image; (b) EFM image (phase shift,  $V_{EFM} = 4$  V,  $z = 50$  nm) before charge injection; (c) EFM image unchanged after charge injection (at the point marked by the arrow) at  $V_{INJ} = 3$  V for 200 s.
